# Supplementary material for: Application of a tandem air-agitated liquid–liquid microextraction technique based on solidification of floating organic droplets as an efficient extraction method for determination of cholesterol-lowering drugs in complicated matrices
Source: Royal Society of Chemistry journal article supplement (doi:10.1039/c6ra19414a), 2016-01-01
Supplement: c6ra19414a1.pdf [file c6ra19414a1.pdf]

**Table S1.** Characteristics of cholesterol-lowering drugs.

| Analytes     | Molecular structure                                                                | Molar mass<br>(g mol <sup>-1</sup> ) | pK <sub>a</sub> |
|--------------|------------------------------------------------------------------------------------|--------------------------------------|-----------------|
| Rosuvastatin | 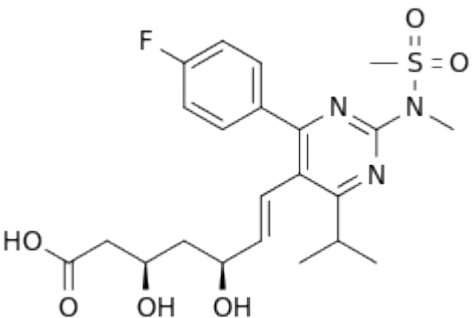  | 481.5                                | 4.0             |
| Atorvastatin |   | 558.6                                | 4.3             |
| Gemfibrozil  |  | 250.3                                | 4.5             |

**Table S2.** Peak areas (responses) for three acidic drugs after their preconcentration through TAALLME-SFO.

| Run | X <sub>1</sub> | X <sub>2</sub> | X <sub>3</sub> | X <sub>4</sub> | R <sub>1</sub><br>(Rosuvastatin) | R <sub>2</sub><br>(Atorvastatin) | R <sub>3</sub><br>(Gemfibrozil) |
|-----|----------------|----------------|----------------|----------------|----------------------------------|----------------------------------|---------------------------------|
| 1   | 4.25           | 110            | 10.75          | 62.5           | 291294                           | 116617                           | 155231                          |
| 2   | 3.5            | 100            | 11.5           | 50             | 533577                           | 498584                           | 370098                          |
| 3   | 3.5            | 100            | 11.5           | 50             | 511579                           | 527498                           | 398135                          |
| 4   | 4.25           | 110            | 12.25          | 37.5           | 566421                           | 296093                           | 191084                          |
| 5   | 4.25           | 90             | 12.25          | 62.5           | 418686                           | 382377                           | 234108                          |
| 6   | 3.5            | 100            | 11.5           | 25             | 548076                           | 305656                           | 197443                          |
| 7   | 3.5            | 100            | 11.5           | 50             | 523577                           | 518584                           | 384875                          |
| 8   | 3.5            | 80             | 11.5           | 50             | 358225                           | 305489                           | 167957                          |
| 9   | 5              | 100            | 11.5           | 50             | 371122                           | 204274                           | 45923                           |
| 10  | 3.5            | 120            | 11.5           | 50             | 450670                           | 208166                           | 264788                          |
| 11  | 4.25           | 90             | 10.75          | 37.5           | 265823                           | 200944                           | 135137                          |
| 12  | 4.25           | 90             | 12.25          | 37.5           | 455570                           | 362483                           | 117036                          |
| 13  | 4.25           | 110            | 10.75          | 37.5           | 358351                           | 85743                            | 125921                          |
| 14  | 2.75           | 90             | 10.75          | 62.5           | 320116                           | 344372                           | 66071                           |
| 15  | 2.75           | 90             | 12.25          | 37.5           | 451832                           | 346927                           | 323141                          |
| 16  | 4.25           | 110            | 12.25          | 62.5           | 455793                           | 324349                           | 345606                          |
| 17  | 2.75           | 110            | 12.25          | 62.5           | 417723                           | 401681                           | 362198                          |
| 18  | 2.75           | 110            | 12.25          | 37.5           | 505923                           | 352491                           | 310889                          |
| 19  | 3.5            | 100            | 10             | 50             | 125393                           | 272749                           | 181363                          |
| 20  | 2.75           | 90             | 12.25          | 62.5           | 472101                           | 388211                           | 324501                          |
| 21  | 3.5            | 100            | 11.5           | 50             | 521579                           | 507498                           | 388135                          |
| 22  | 3.5            | 100            | 11.5           | 75             | 437694                           | 343802                           | 256646                          |
| 23  | 4.25           | 90             | 10.75          | 62.5           | 236752                           | 194874                           | 84583                           |
| 24  | 3.5            | 100            | 13             | 50             | 482099                           | 500206                           | 536118                          |
| 25  | 2.75           | 90             | 10.75          | 37.5           | 290114                           | 365645                           | 165563                          |
| 26  | 2.75           | 110            | 10.75          | 37.5           | 370181                           | 301881                           | 95944                           |
| 27  | 2              | 100            | 11.5           | 50             | 388195                           | 431184                           | 108234                          |
| 28  | 3.5            | 100            | 11.5           | 50             | 527879                           | 507498                           | 369935                          |
| 29  | 2.75           | 110            | 10.75          | 62.5           | 330422                           | 362459                           | 95960                           |
| 30  | 3.5            | 100            | 11.5           | 50             | 522879                           | 517498                           | 369935                          |

**Table S3.** ANOVA for central composite design.

| Source of variation   | Sum of squares            | Degree of freedom          | Mean square | F-value  | P-value  |
|-----------------------|---------------------------|----------------------------|-------------|----------|----------|
| Drug 1                |                           |                            |             |          |          |
| Model                 | 3.27E+11                  | 14                         | 2.34E+10    | 141.4079 | < 0.0001 |
| Residual              | 2.48E+09                  | 15                         | 1.65E+08    |          |          |
| Lack-of-fit           | 2.21E+09                  | 10                         | 2.21E+08    | 4.148341 | 0.0649   |
| Pure error            | 2.67E+08                  | 5                          | 53382561    |          |          |
| R <sup>2</sup> = 0.99 | Adj-R <sup>2</sup> = 0.98 | Pred-R <sup>2</sup> = 0.96 |             |          |          |
| Drug 2                |                           |                            |             |          |          |
| Model                 | 4.19E+11                  | 14                         | 2.99E+10    | 121.9317 | < 0.0001 |
| Residual              | 3.68E+09                  | 15                         | 2.45E+08    |          |          |
| Lack-of-fit           | 3.15E+09                  | 10                         | 3.15E+08    | 2.971664 | 0.1205   |
| Pure error            | 5.3E+08                   | 5                          | 1.06E+08    |          |          |
| R <sup>2</sup> = 0.99 | Adj-R <sup>2</sup> = 0.98 | Pred-R <sup>2</sup> = 0.95 |             |          |          |
| Drug 3                |                           |                            |             |          |          |
| Model                 | 4.61E+11                  | 14                         | 3.29E+10    | 70.79638 | < 0.0001 |
| Residual              | 6.98E+09                  | 15                         | 4.65E+08    |          |          |
| Lack-of-fit           | 6.26E+09                  | 10                         | 6.26E+08    | 4.350142 | 0.0592   |
| Pure error            | 7.19E+08                  | 5                          | 1.44E+08    |          |          |
| R <sup>2</sup> = 0.98 | Adj-R <sup>2</sup> = 0.97 | Pred-R <sup>2</sup> = 0.92 |             |          |          |

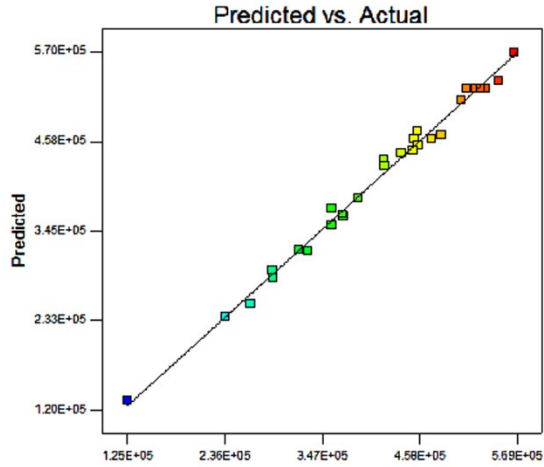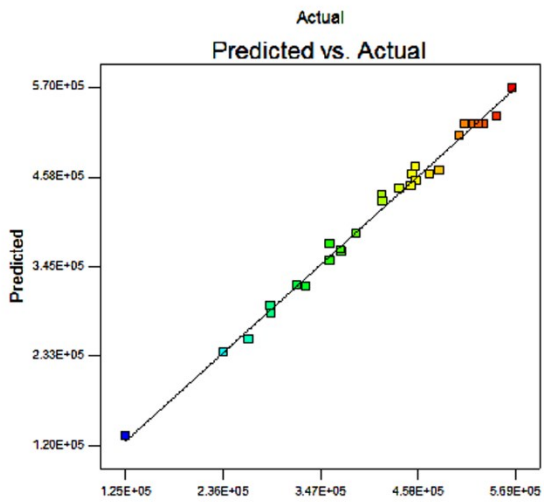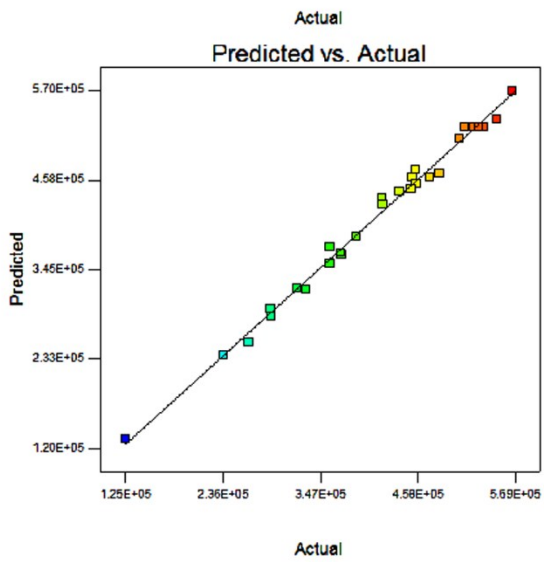

Fig. S1. 2D plots of experimental peak areas versus predicted peak areas obtained through corresponding fitted models for the target analytes (a, b, and c are related to rosuvastatin, atorvastatin and gemfibrozil, respectively).
